# Supplementary material for: Impact of agricultural management on bacterial laccase-encoding genes with possible implications for soil carbon storage in semi-arid Mediterranean olive farming
Source: PeerJ journal article supplement (doi:10.7717/peerj.2257), 2016-07-21

RNA based DGGE:

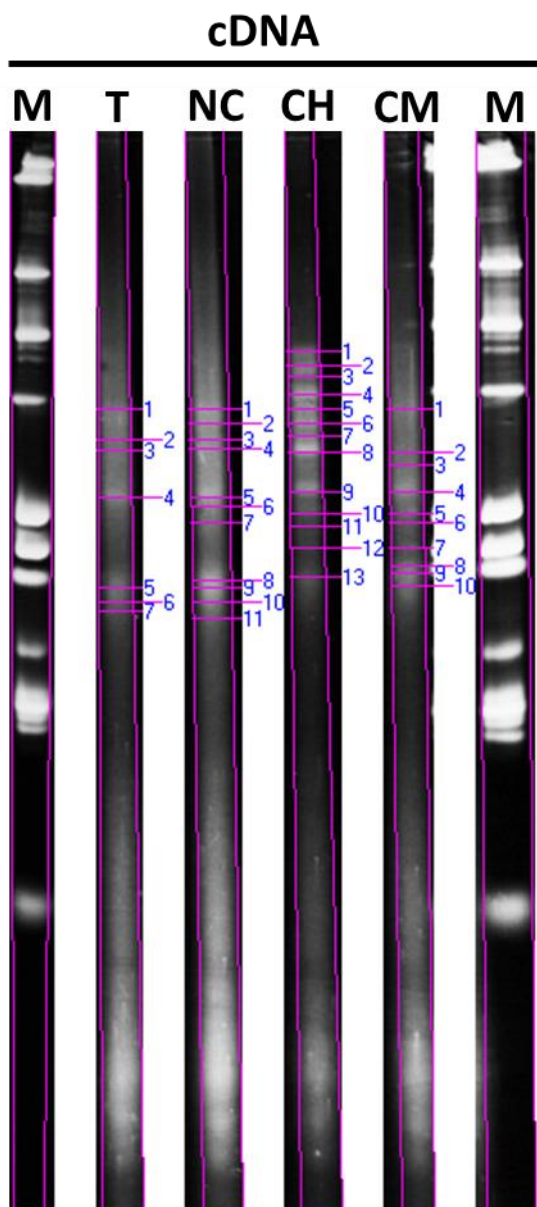

Supplement: DGGE_bands.pdf [file DGGE_bands.pdf]
